# Supplementary material for: HIF1α-Dependent Metabolic Signals Control the Differentiation of Follicular Helper T Cells
Source: PubMed Central journal article supplement (PMC6912655; doi:10.3390/cells8111450), 2019-11-17
Supplement: cells-08-01450-s001.pdf [file cells-08-01450-s001.pdf]

## Supplemental Figure

# HIF1 $\alpha$ -dependent metabolic signals control the differentiation of follicular helper T cells

Lin Dong<sup>1,#</sup>, Ying He<sup>1,#</sup>, Shuping Zhou<sup>2,#</sup>, Yejin Cao<sup>1</sup>, Yan Li<sup>1</sup>, Yujing Bi<sup>3,\*</sup>, Guangwei Liu<sup>1,\*</sup>

<sup>1</sup>Key Laboratory of Cell Proliferation and Regulation Biology, Ministry of Education, Institute of Cell Biology, College of Life Sciences, Beijing Normal University, Beijing China; <sup>2</sup>Institute of Basic Medicine, Shandong First Medical University & Shandong Academy of Medical School, Jinan China; <sup>3</sup>State Key Laboratory of Pathogen and Biosecurity, Beijing Institute of Microbiology and Epidemiology, Beijing China

Fig. S1

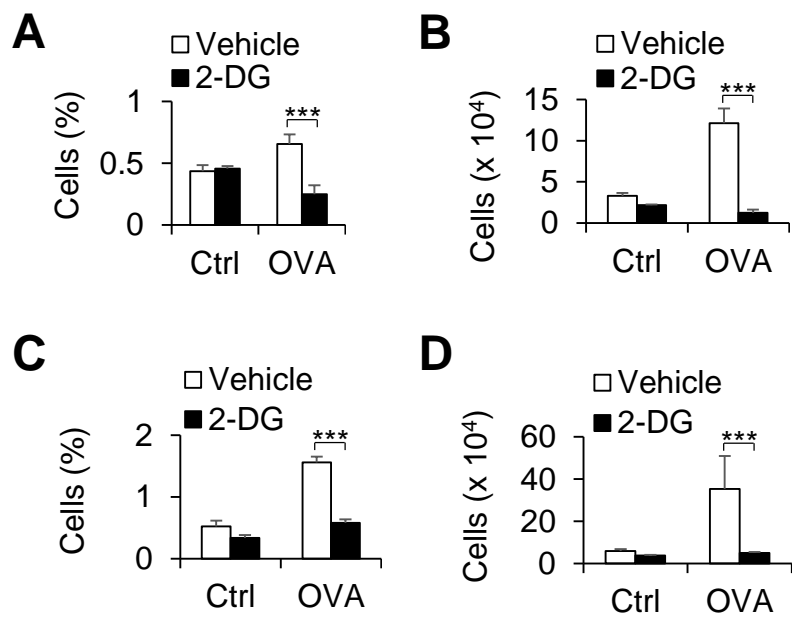

**Figure S1. Blocking glycolysis inhibits T<sub>FH</sub> cell differentiation upon foreign antigen stimuli.** Flow cytometry analysis of plasma cells and IL-21<sup>+</sup>CXCR5<sup>+</sup>T<sub>FH</sub> cells in spleen. The percent and absolute number of plasma cells (A and B) and IL-21<sup>+</sup>CXCR5<sup>+</sup>T<sub>FH</sub> cells (C-D) are shown. \*\*\*P < 0.001, compared with the indicated groups.

**Fig. S2**

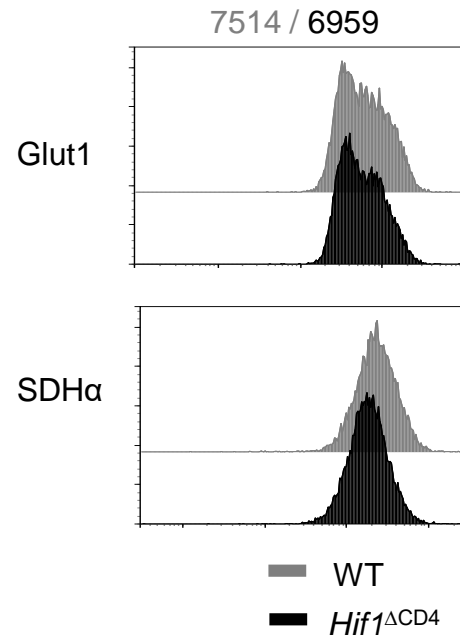

**Figure S2. HIF1 $\alpha$  is responsible for glycolysis and OXPHOS in T<sub>FH</sub> cell differentiation and GC responses.**

Flow cytometry analysis of Glut1 and SDH $\alpha$  expression of T<sub>FH</sub> cells in spleen from WT and HIF1 $\alpha$ -deficient mice at 8 days after OVA-immunization.

**Fig. S3**

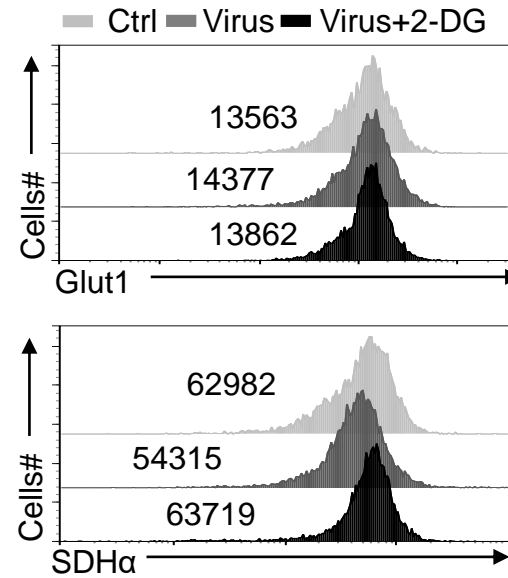

**Figure S3. Alterations of glycolysis and OXPHOS signaling controls T<sub>FH</sub> cell differentiation upon PR8 virus infection.** Flow cytometry analysis of Glut1 and SDHα expression of T<sub>FH</sub> cells in lung from PR8-infected mice at 8 days in the presence of 2-DG treatment. .

**Fig. S4**

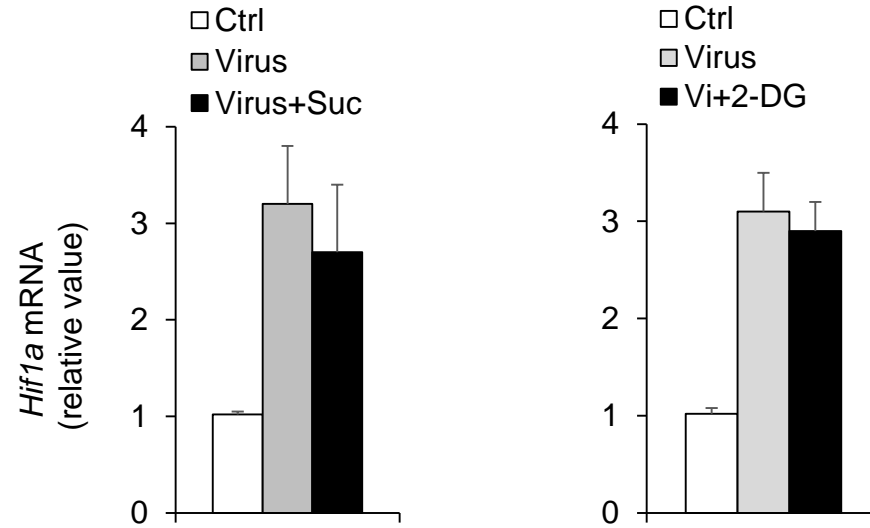

**Fig. S4. Alterations of glycolysis and OXPHOS signaling controls T<sub>FH</sub> cell differentiation upon PR8 virus infection.** Real-time PCR of *Hif1a* mRNA in T<sub>FH</sub> cells sorted from lung from PR8-infected mice at 8 days in the presence of 2-DG treatment.

**Fig. S5**

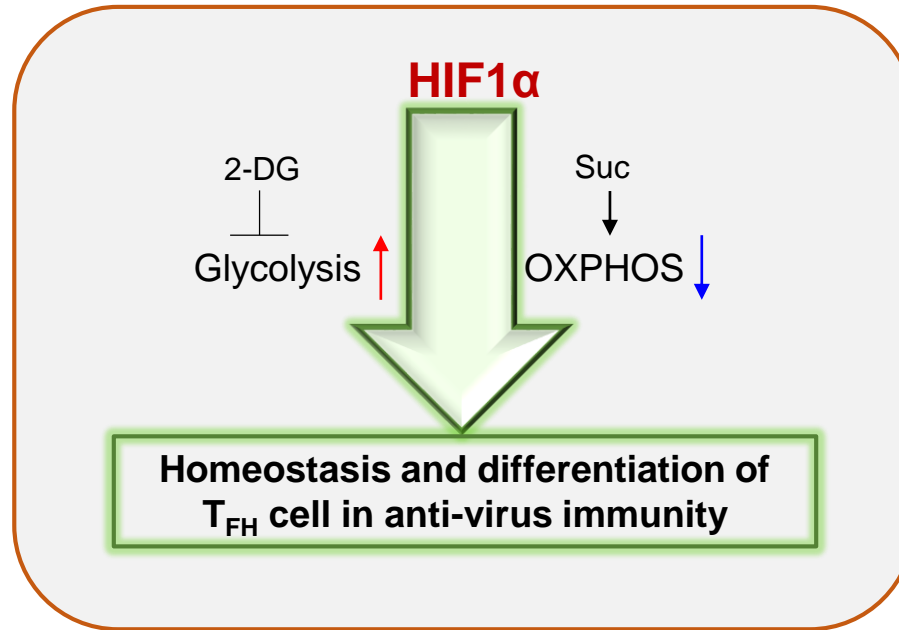

**Fig. S5 Regulations of glycolytic activities on homeostasis and differentiation of T<sub>FH</sub> cells in anti-virus immunity.** Proposed model how glycolysis and OXPHOS in T<sub>FH</sub> cells integrate the adaptive stimuli to regulate the GC responses and T<sub>FH</sub> cell differentiation under steady state or antigen immunization even in anti-virus immunity through metabolic dependent mechanisms.
